# Supplementary material for: Identification of oxygen sites in β-ketoenamine-linked covalent organic frameworks for highly efficient uranium adsorption through experimental and theoretical studies
Source: Royal Society of Chemistry journal article supplement (doi:10.1039/d3va00324h), 2023-11-28
Supplement: d3va00324h1.pdf [file d3va00324h1.pdf]

## Supporting Information (SI)

### **Identification of oxygen sites in $\beta$ -ketoenamine-linked covalent organic frameworks for highly efficient uranium adsorption through experimental and theoretical studies**

Tao Wen,<sup>‡</sup> Xinjie Ma,<sup>‡</sup> Yingzhong Huo, Ruoxuan Guo, Sai Zhang, Yanan Han, Yang Liu, Yuejie Ai\* and Xiangke Wang\*

MOE Key Laboratory of Resources and Environmental Systems Optimization, College of Environment and Chemical Engineering, North China Electric Power University, Beijing 102206, P.R. China

\*: Corresponding author. Fax (Tel): +86-10-61772890; Email: aiyuejie314@126.com (Y. Ai), xkwang@ncepu.edu.cn (X. Wang).

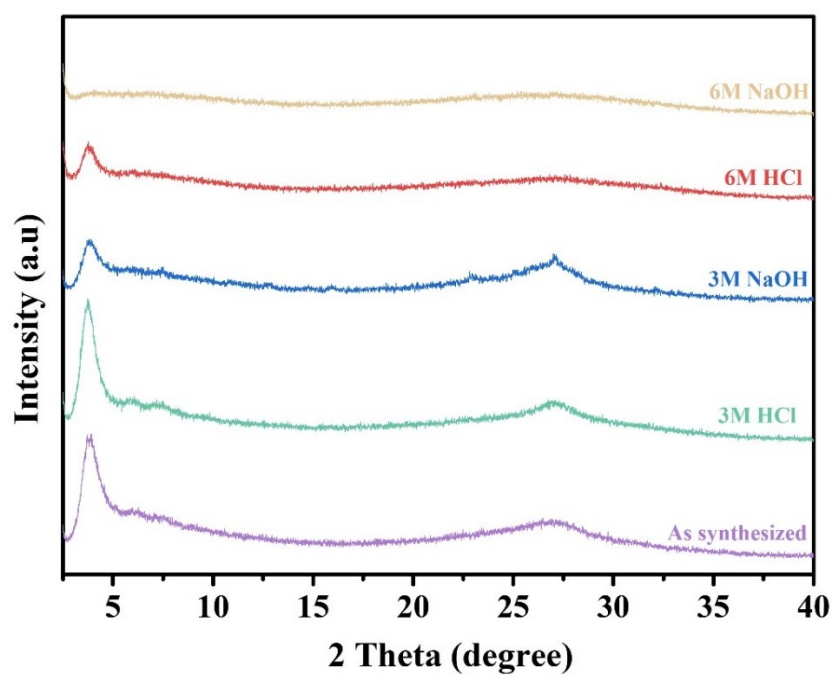

**Fig. S1.** PXRD patterns of DQTP COF before and after treatment under acid and alkali conditions

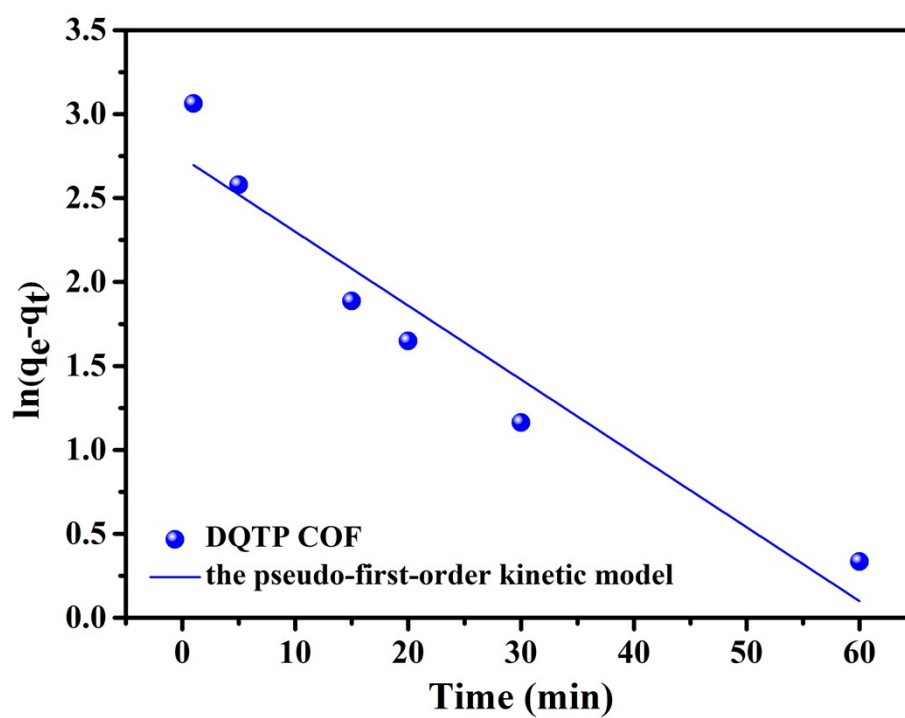

**Fig. S2.** The pseudo-first-order kinetic model for the adsorption. Conditions:  $C_{U(VI)} = 10$  ppm,  $m/V = 0.2$  g/L,  $pH = 6.0 \pm 0.1$ ,  $T = 298$  K.

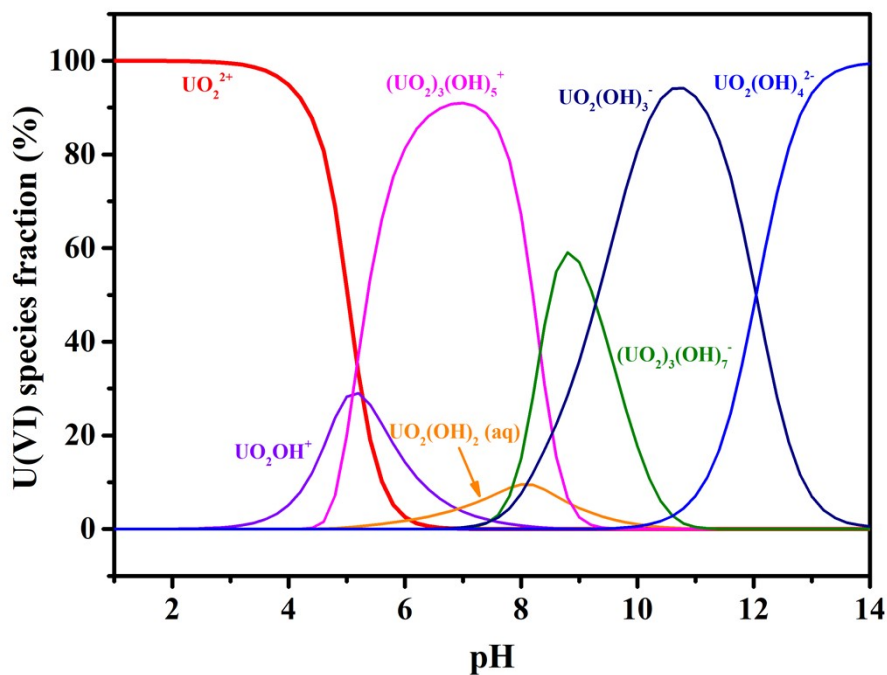

**Fig. S3.** The U(VI) species fraction at different pH values.

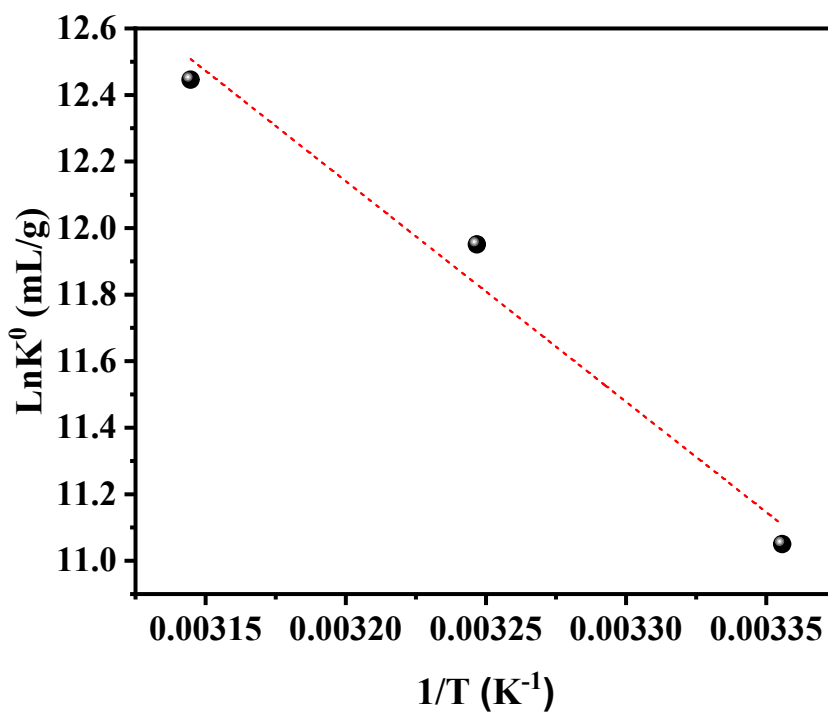

**Fig. S4.** The linear plot of  $\ln K^0$  vs.  $1/T$  for U(VI) adsorption on DQTP COF at 298, 308, and 318 K.  $m/V = 0.2$  g/L,  $pH = 6.0 \pm 0.1$ .

The Gibbs free energy change ( $\Delta G^0$ , kJ mol<sup>-1</sup>), enthalpy change ( $\Delta H^0$ , kJ mol<sup>-1</sup>) and enthalpy change ( $\Delta S^0$ , J mol<sup>-1</sup> K<sup>-1</sup>) of the ion-exchange process can be calculated by combining the two following equations:

$$\ln K^0 = \frac{\Delta S^0}{R} - \frac{\Delta H^0}{RT} \quad (1)$$

$$\Delta G^0 = \Delta H^0 - T\Delta S^0 \quad (2)$$

where  $T$  (K) is the absolute temperature, and  $R$  is the universal gas constant (8.314 J mol<sup>-1</sup> K<sup>-1</sup>). The ion-exchange constant,  $K^0$ , can be determined by plotting  $\ln K_d^U$  vs.  $1/T$  and further extrapolating  $C_e$  to 0.

Table S1 Comparison of adsorption capacity with other COFs.

| Adsorbent    | Experimental conditions      | Adsorption capacity(mg/g) | Reference |
|--------------|------------------------------|---------------------------|-----------|
| COF-PDAN-AO  | pH=4, T=298K, m/V=0.5 g/L    | 410                       | [1]       |
| TP-COF-AO    | pH=6, T=298K, m/V=0.5 g/L    | 436                       | [2]       |
| HDU-102-AO   | pH=5, T=298K, m/V=0.2 g/L    | 389.08                    | [3]       |
| HDU-102      | pH=5, T=298K, m/V=0.2 g/L    | 250.49                    | [3]       |
| COF-1        | pH=7, T=298K, m/V=0.4 g/L    | 411                       | [4]       |
| TpPa-1       | pH=6, T=298K, m/V=0.5 g/L    | 120                       | [5]       |
| TpBpy        | pH=5, T=298K, m/V=0.2 g/L    | 115.45                    | [6]       |
| TpPy         | pH=6, T=298K, m/V=0.2 g/L    | 291.79                    | [6]       |
| TpDb-AO      | pH=6, T=298K, m/V=0.5 g/L    | 380                       | [7]       |
| JUC-505-AO   | pH=5, T=298K, m/V=0.025 g/L  | 395                       | [8]       |
| JUC-505-COOH | pH=6, T=298K, m/V=0.025 g/L  | 464                       | [8]       |
| CNT/COF-OH   | pH=5, T=298K, m/V=0.25 g/L   | 518.2                     | [9]       |
| MOF@COF      | pH=6.5, T=298K, m/V=0.02 g/L | 536.73                    | [10]      |
| DQTP COF     | pH=6, T=298K, m/V=0.2 g/L    | 517.62                    | This work |

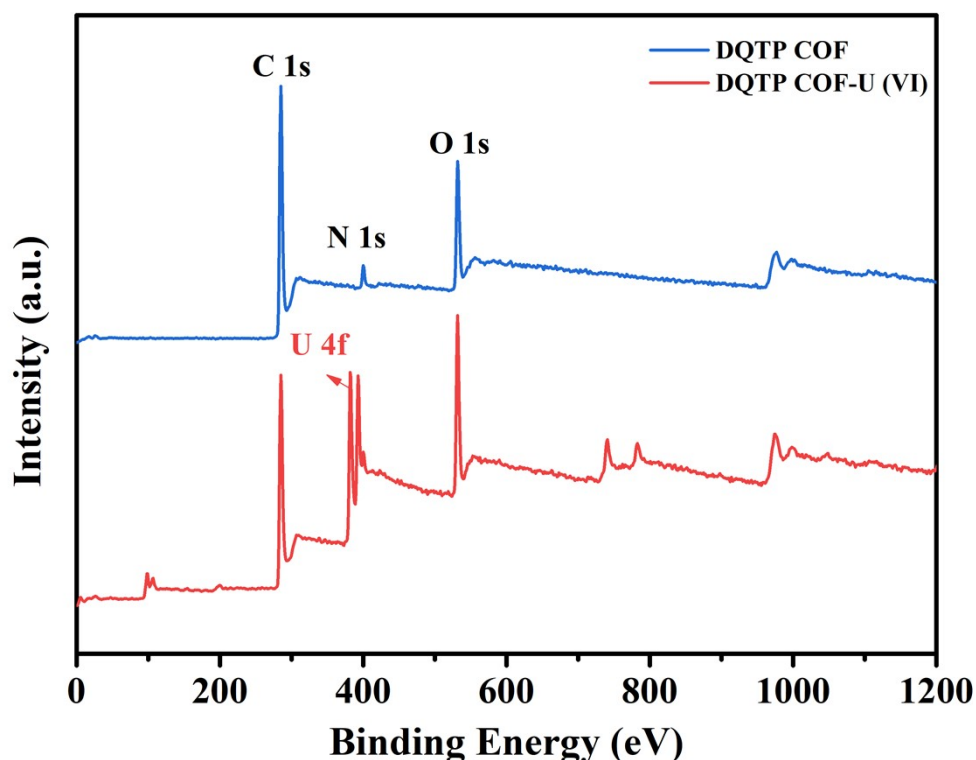

Fig. S5. XPS survey spectrum of DQTP COF before and after U(VI) adsorption

## Reference

- [1] Li F, Cui W, Jiang W, et al. Stable sp carbon-conjugated covalent organic framework for detection and efficient adsorption of uranium from radioactive wastewater[J]. *Journal of Hazardous Materials*, 2020, 392.
- [2] Zhang C R, Cui W R, Jiang W, et al. Simultaneous sensitive detection and rapid adsorption of  $\text{UO}_2^{2+}$  based on a post-modified sp(2) carbon-conjugated covalent organic framework[J]. *Environmental Science: Nano*, 2020, 7(3): 842-850.
- [3] Wang C, Xi W, Guo R, et al. A novel amidoxime-functionalized covalent organic framework for removal of U(VI) from uranium-containing wastewater with appreciable efficiency and selectivity[J]. *Journal of Radioanalytical and Nuclear Chemistry*, 2022, 331(6): 2469-2478.
- [4] Yang S, Yin J, Li Q, et al. Covalent organic frameworks functionalized electrodes for simultaneous removal of  $\text{UO}_2^{2+}$  and  $\text{ReO}_4^-$  with fast kinetics and high capacities by electro-adsorption[J]. *Journal of Hazardous Materials*, 2022, 429.
- [5] Li Z D, Zhang H Q, Xiong X H, et al. U(VI) adsorption onto covalent organic frameworks-TpPa-1[J]. *Journal of Solid State Chemistry*, 2019, 277: 484-492.
- [6] Guo R X, Liu Y, Huo Y Z, et al. Chelating effect between uranyl and pyridine N containing covalent organic frameworks: A combined experimental and DFT approach[J]. *Journal of Colloid and Interface Science*, 2022, 606: 1617-1626.
- [7] Sun Q, Aguila B, Earl L D, et al. Covalent organic frameworks as a decorating platform for utilization and affinity enhancement of chelating sites for radionuclide sequestration[J]. *Advanced Materials*, 2018, 30(20): 1705479.

- [8] Li Z, Zhu R, Zhang P, et al. Functionalized polyarylether-based COFs for rapid and selective extraction of uranium from aqueous solution[J]. Chemical Engineering Journal, 2022, 434: 134623
- [9] Liu X, Wang X, Jiang W, et al. Covalent organic framework modified carbon nanotubes for removal of uranium (VI) from mining wastewater[J]. Chemical Engineering Journal, 2022, 450.
- [10] Zhong X, Liu Y X, Liang W, et al. Construction of core-shell MOFs@COF hybrids as a platform for the removal of  $\text{UO}_2^{2+}$  and  $\text{Eu}^{3+}$  ions from solution [J]. ACS Applied Materials and Interfaces, 2021, 13(11): 13883-13895.
